# Supplementary material
Source: PubMed Central journal article supplement (PMC9221683)
Supplement: mmc1.pdf [file mmc1.pdf]

# THE LANCET

## Child & Adolescent Health

### Supplementary appendix

This appendix formed part of the original submission and has been peer reviewed. We post it as supplied by the authors.

Supplement to: Kikkenborg Berg S, Palm P, Nygaard U, et al. Long COVID symptoms in SARS-CoV-2-positive children aged 0–14 years and matched controls in Denmark (LongCOVIDKidsDK): a national, cross-sectional study. *Lancet Child Adolesc Health* 2022; published online June 22. [https://doi.org/10.1016/S2352-4642\(22\)00154-7](https://doi.org/10.1016/S2352-4642(22)00154-7).

**Contents supplementary**

|                                                                                                                             |    |
|-----------------------------------------------------------------------------------------------------------------------------|----|
| <b>Investigators</b> .....                                                                                                  | 2  |
| <b>Table S1- Duration of all symptoms in cases and controls aged 0-3 years.</b> .....                                       | 3  |
| <b>Table S2- Duration of all symptoms in cases and controls aged 4-11 years.</b> .....                                      | 6  |
| <b>Table S3- Duration of all symptoms in cases and controls aged 12-14 years.</b> .....                                     | 10 |
| <b>Table S4- Sex differences in proportion experiencing at least one symptom for at least 8 weeks.</b> .....                | 14 |
| <b>Table S5- Sick leave during the past 12 months</b> .....                                                                 | 15 |
| <b>Table S6 - Psychological and social symptoms in cases and controls<sup>a</sup></b> .....                                 | 17 |
| <b>Table S7 - Demographic and clinical profile for the long COVID groups<sup>a</sup> across age groups</b> .....            | 19 |
| <b>Table S8 – Symptoms in the long COVID groups</b> .....                                                                   | 22 |
| <b>Table S9 - Long COVID-19 symptoms (prevalence and duration) among cases with new symptoms divided by age group</b> ..... | 23 |
| <b>Table S10 - Sick days during the past 12 months for the long COVID groups</b> .....                                      | 27 |
| <b>Table S11 - Questionnaire LongCOVIDKidsDK</b> .....                                                                      | 28 |
| <b>Table S12 - Covid-19 Denmark: School/national lockdown and reopening, and changes in testing policies</b> .....          | 30 |

## Investigators

Selina Kikkenborg Berg, Professor<sup>a,b</sup>, Pernille Palm, Post doc, Ulrikka Nygaard, Associate Professor<sup>c</sup>, Henning Bundgaard, Professor<sup>a,b</sup>, Maria Nivi Schmidt Petersen, Msc<sup>c</sup>, Siri Rosenkilde, Msc<sup>c</sup>, Anne Bonde Thorsted, Msc<sup>c</sup>, Annette Kjær Ersbøll, Professor<sup>c</sup>, Susanne Dam Nielsen, Professor<sup>b,d</sup>, Lau Casper Thygesen, Professor<sup>c</sup>, Anne Vinggaard Christensen, Post doc<sup>a</sup>

<sup>a</sup>Department of Cardiology, Rigshospitalet, Copenhagen University Hospital, Inge Lehmanns Vej 7, 2100 Copenhagen, Denmark

<sup>b</sup>Faculty of Health and Medical Sciences, University of Copenhagen, Blegdamsvej 3B, 2200 Copenhagen N, Denmark

<sup>c</sup>The National Institute of Public Health, University of Southern Denmark, Studiestræde 6, 1455 Copenhagen, Denmark

<sup>d</sup>Department of Infectious Disease, Rigshospitalet, Copenhagen University Hospital, Blegdamsvej 9, 2100 Copenhagen, Denmark

<sup>e</sup>Department of Paediatrics and Adolescents Medicine, Rigshospitalet, Copenhagen University Hospital, Blegdamsvej 9, 2100 Copenhagen, Denmark

### **Corresponding author:**

Professor Selina Kikkenborg Berg

Rigshospitalet

The Heart Centre, Unit 2151

Blegdamsvej 9

2100 Copenhagen

Denmark

Phone: +45 35459526

E-mail: [selina@rh.dk](mailto:selina@rh.dk)

**Table S1- Duration of all symptoms in cases and controls aged 0-3 years.**

|                                      | <b>At least 2 months</b> | <b>At least 3 months</b> | <b>At least 6 months</b> | <b>At least 9 months</b> | <b>At least 12 months</b> |
|--------------------------------------|--------------------------|--------------------------|--------------------------|--------------------------|---------------------------|
|                                      | Cases/controls           | Cases/controls           | Cases/controls           | Cases/controls           | Cases/controls            |
| <b>Total n</b>                       | 1,194/3,855              | 1,194/3,855              | 899/3,000                | 167/1,878                | 67/1,163                  |
| <b>Stomach aches, n (%)</b>          |                          |                          |                          |                          |                           |
| Almost never and Sometimes           | 77 (6.4)/<br>108 (2.8)   | 62 (5.2)/<br>81 (2.1)    | 35 (3.9)/<br>40 (1.3)    | 7 (3.0)/<br>19 (1.0)     | 1-4 /<br>7 (0.6)          |
| Often and Almost always              | 40 (3.3)/<br>53 (1.4)*   | 34 (2.8)/<br>51 (1.3)    | 15 (1.7)/<br>30 (1.0)    | 0/<br>17 (0.9)           | 0/<br>8 (0.7)             |
| <b>Fatigue, n (%)</b>                |                          |                          |                          |                          |                           |
| Almost never and Sometimes           | 82 (6.9)/<br>93 (2.4)    | 69 (5.8)/<br>74 (1.9)    | 28 (3.1)/<br>40 (1.3)    | 1-4/<br>19 (1.0)         | 0/<br>8 (0.7)             |
| Often and Almost always              | 41 (3.4)/<br>36 (0.9)*   | 35 (2.9)/<br>29 (0.8)    | 18 (2.0)/<br>17 (0.6)*   | 1-4/<br>7 (0.4)          | 1-4/<br>1-4               |
| <b>Pain in muscles/joints, n (%)</b> |                          |                          |                          |                          |                           |
| Almost never and Sometimes           | 34 (2.8)/<br>36 (0.9)    | 29 (2.4)/<br>30 (0.8)    | 11 (1.2)/<br>20 (0.7)    | 1-4 /<br>6 (0.3)         | 0/<br>1-4/                |
| Often and Almost always              | 5 (0.4)/<br>7 (0.2)      | 5 (0.4)/<br>5 (0.1)      | 1-4/<br>1-4              | 0/<br>1-4                | 0/<br>0                   |
| <b>Rashes, n (%)</b>                 |                          |                          |                          |                          |                           |
| Almost never and Sometimes           | 80 (6.7)/<br>168 (4.4)   | 70 (5.9)/<br>135 (3.5)   | 47 (5.2)/<br>80 (2.7)    | 5 (3.0)/<br>33 (1.8)     | 1-4/<br>20 (1.7)          |
| Often and Almost always              | 53 (4.4)/<br>104 (2.7)   | 48 (4.0)/<br>99 (2.6)    | 30 (3.3)/<br>67 (2.2)    | 6 (3.6)/<br>33 (1.8)     | 1-4/<br>19 (1.6)          |
| <b>Mood swings, n (%)</b>            |                          |                          |                          |                          |                           |
| Almost never and Sometimes           | 122 (10.2)/<br>211 (5.5) | 102 (8.5)/<br>179 (4.6)  | 60 (6.7)/<br>100 (3.3)   | 5 (3.0)/<br>51 (2.7)     | 1-4/<br>29 (2.5)          |
| Often and Almost always              | 73 (6.1)/<br>146 (3.8)   | 67 (5.6)/<br>135 (3.5)   | 36 (4.0)/<br>87 (2.9)    | 9 (5.4)/<br>43 (2.3)     | 1-4/<br>26 (2.2)          |
| <b>Nausea, n (%)</b>                 |                          |                          |                          |                          |                           |

|                                           |                        |                       |                        |                      |                  |
|-------------------------------------------|------------------------|-----------------------|------------------------|----------------------|------------------|
| Almost never and Sometimes                | 19 (1.6)/<br>16 (0.4)  | 15 (1.3)/<br>14 (0.4) | 6 (0.7)/<br>7 (0.2)    | 1-4/<br>1-4          | 0/<br>1-4        |
| Often and Almost always                   | 5 (0.4)/<br>1-4        | 1-4/<br>1-4           | 1-4/<br>1-4            | 1-4/<br>1-4          | 0/<br>0          |
| <b>Fever, n (%)</b>                       |                        |                       |                        |                      |                  |
| Almost never and Sometimes                | 49 (4.1)/<br>49 (1.3)  | 42 (3.5)/<br>40 (1.0) | 31 (3.4)/<br>20 (0.7)  | 1-4/<br>8 (0.4)      | 1-4/<br>5 (0.4)  |
| Often and Almost always                   | 22 (1.8)/<br>13 (0.3)* | 20 (1.7)/<br>9 (0.2)  | 13 (1.4)/<br>1-4*      | 1-4/<br>1-4          | 1-4/<br>1-4      |
| <b>Loss of appetite, n (%)</b>            |                        |                       |                        |                      |                  |
| Almost never and Sometimes                | 92 (7.7)/<br>86 (2.2)  | 81 (6.8)/<br>69 (1.8) | 41 (4.6)/<br>38 (1.3)  | 6 (3.6)/<br>19 (1.0) | 1-4/<br>14 (1.2) |
| Often and Almost always                   | 49 (4.1)/<br>42 (1.1)* | 44 (3.7)/<br>38 (1.0) | 20 (2.2)/<br>26 (0.9)* | 1-4/<br>9 (0.5)      | 1-4/<br>1-4      |
| <b>Trouble breathing, n (%)</b>           |                        |                       |                        |                      |                  |
| Almost never and Sometimes                | 60 (5.0)/<br>24 (0.6)  | 54 (4.5)/<br>14 (0.4) | 34 (3.8)/<br>7 (0.2)   | 1-4/<br>1-4          | 1-4/<br>1-4      |
| Often and Almost always                   | 18 (1.5)/<br>13 (0.3)* | 17 (1.4)/<br>9 (0.2)  | 9 (1.0)/<br>1-4*       | 0/<br>1-4            | 0/<br>0          |
| <b>Dark circles under the eyes, n (%)</b> |                        |                       |                        |                      |                  |
| Almost never and Sometimes                | 35 (2.9)/<br>22 (0.6)  | 30 (2.5)/<br>13 (0.3) | 21 (2.3)/<br>7 (0.2)   | 1-4/<br>1-4          | 1-4/<br>1-4      |
| Often and Almost always                   | 17 (1.4)/<br>9 (0.2)*  | 17 (1.4)/<br>8 (0.2)  | 13 (1.4)/<br>5 (0.2)*  | 1-4/<br>1-4          | 1-4/<br>1-4      |
| <b>Palpitations, n (%)<sup>a</sup></b>    |                        |                       |                        |                      |                  |
| Almost never and Sometimes                | 1-4/<br>6 (0.2)        | 1-4/<br>5 (0.1)       | 1-4/<br>1-4            | 0/<br>1-4            | 0/<br>1-4        |
| Often and Almost always                   | 1-4/<br>1-4            | 1-4/<br>1-4           | 1-4/<br>0              | 1-4/<br>0            | 0/<br>0          |
| <b>Cold hands/feet, n (%)</b>             |                        |                       |                        |                      |                  |
| Almost never and Sometimes                | 37 (3.1)/<br>43 (1.1)  | 33 (2.8)/<br>30 (0.8) | 18 (2.0)/<br>13 (0.4)  | 1-4/<br>7 (0.4)      | 0/<br>5 (0.4)    |

|                                        |                        |                       |                        |                     |               |
|----------------------------------------|------------------------|-----------------------|------------------------|---------------------|---------------|
| Often and Almost always                | 14 (1.2)/<br>12 (0.3)* | 12 (1.0)/<br>9 (0.2)  | 10 (1.1)/<br>5 (0.2)*  | 1-4/<br>1-4         | 0/<br>0       |
| <b>Cough, n (%)</b>                    |                        |                       |                        |                     |               |
| Almost never and Sometimes             | 93 (7.8)/<br>65 (1.7)  | 81 (6.8)/<br>36 (0.9) | 33 (3.7)/<br>14 (0.5)  | 1-4/<br>7 (0.4)     | 0/<br>5 (0.4) |
| Often and Almost always                | 77 (6.4)/<br>55 (1.4)* | 68 (5.7)/<br>47 (1.2) | 40 (4.4)/<br>21 (0.7)* | 5 (3.0)/<br>6 (0.3) | 1-4/<br>1-4   |
| <b>Chapped lips, n (%)</b>             |                        |                       |                        |                     |               |
| Almost never and Sometimes             | 12 (1.0)/<br>9 (0.2)   | 8 (0.7)/<br>5 (0.1)   | 5 (0.6)/<br>1-4        | 1-4/<br>1-4         | 1-4/<br>1-4   |
| Often and Almost always                | 0/<br>1-4              | 0/<br>1-4             | 0/<br>0                | 0/<br>0             | 0/<br>0       |
| <b>Discoloured fingers/toes, n (%)</b> |                        |                       |                        |                     |               |
| Almost never and Sometimes             | 0/<br>1-4              | 0/<br>1-4             | 0/<br>1-4              | 0/<br>1-4           | 0/<br>1-4     |
| Often and Almost always                | 1-4/<br>1-4            | 1-4/<br>1-4           | 0/<br>1-4              | 0/<br>1-4           | 0/<br>0       |
| <b>Extreme paleness, n (%)</b>         |                        |                       |                        |                     |               |
| Almost never and Sometimes             | 1-4/<br>1-4            | 1-4/<br>1-4           | 1-4/<br>1-4            | 0/<br>0             | 0/<br>0       |
| Often and Almost always                | 5 (0.4)/<br>5 (0.1)    | 5 (0.4)/<br>5 (0.1)   | 1-4/<br>1-4            | 0/<br>1-4           | 0/<br>1-4     |

<sup>a</sup> 1,062 missing for this symptom because of a technical error in the questionnaire for the age group 13-24 months.

\*  $p < 0.0009$ . Differences in proportions between groups are tested at 2 and 6 months using Chi-Square tests.

**Table S2- Duration of all symptoms in cases and controls aged 4-11 years.**

|                                      | <b>At least 2 months</b> | <b>At least 3 months</b> | <b>At least 6 months</b> | <b>At least 9 months</b> | <b>At least 12 months</b> |
|--------------------------------------|--------------------------|--------------------------|--------------------------|--------------------------|---------------------------|
|                                      | Cases/controls           | Cases/controls           | Cases/controls           | Cases/controls           | Cases/controls            |
| Total n                              | 5,023/18,372             | 5,023/18,372             | 3614/13,546              | 628/8,276                | 183/5,269                 |
| <b>Stomach aches, n (%)</b>          |                          |                          |                          |                          |                           |
| Almost never and Sometimes           | 388 (7.7)/<br>982 (5.3)  | 351 (7.0)/<br>872 (4.7)  | 228 (6.3)/<br>568 (4.2)  | 25 (4.0)/<br>316 (3.8)   | 10 (5.5)/<br>202 (3.8)    |
| Often and Almost always              | 125 (2.5)/<br>477 (2.6)  | 116 (2.3)/<br>444 (2.4)  | 76 (2.1)/<br>302 (2.2)   | 8 (1.3)/<br>170 (2.1)    | 1-4/<br>94 (1.8)          |
| <b>Chest pain, n (%)</b>             |                          |                          |                          |                          |                           |
| Almost never and Sometimes           | 112 (2.2)/<br>209 (1.1)  | 94 (1.9)/<br>191 (1.0)   | 53 (1.5)/<br>122 (0.9)   | 7 (1.1)/<br>69 (0.8)     | 1-4/<br>36 (0.7)          |
| Often and Almost always              | 10 (0.2)/<br>14 (0.1)    | 5 (0.1)/<br>9 (0.0)      | 1-4/<br>6 (0.0)          | 0/<br>1-4                | 0/<br>1-4                 |
| <b>Headache, n (%)</b>               |                          |                          |                          |                          |                           |
| Almost never and Sometimes           | 486 (9.6)/<br>937 (5.1)  | 439 (8.7)/<br>853 (4.6)  | 281 (7.8)/<br>562 (4.1)  | 37 (5.9)/<br>287 (3.5)   | 9 (4.9)/<br>168 (3.2)     |
| Often and Almost always              | 126 (2.5)/<br>299 (1.6)* | 115 (2.3)/<br>273 (1.5)  | 79 (2.2)/<br>171 (1.3)*  | 14 (2.2)/<br>84 (1.0)    | 5 (2.7)/<br>49 (0.9)      |
| <b>Fatigue, n (%)</b>                |                          |                          |                          |                          |                           |
| Almost never and Sometimes           | 441 (8.8)/<br>1007 (5.5) | 391 (7.8)/<br>877 (4.8)  | 235 (6.5)/<br>551 (4.1)  | 33 (5.2)/<br>280 (3.4)   | 12 (6.6)/<br>162 (3.1)    |
| Often and Almost always              | 194 (3.9)/<br>418 (2.3)* | 166 (3.3)/<br>389 (2.1)  | 95 (2.6)/<br>248 (1.8)   | 12 (1.9)/<br>134 (1.6)   | 1-4/<br>76 (1.4)          |
| <b>Pain in muscles/joints, n (%)</b> |                          |                          |                          |                          |                           |
| Almost never and Sometimes           | 297 (5.9)/<br>665 (3.6)  | 262 (5.2)/<br>566 (3.1)  | 165 (4.6)/<br>364 (2.7)  | 23 (3.7)/<br>188 (2.3)   | 7 (3.8)/<br>110 (2.1)     |
| Often and Almost always              | 72 (1.4)/<br>199 (1.1)   | 67 (1.3)/<br>187 (1.0)   | 42 (1.2)/<br>131 (1.0)   | 11 (1.7)/<br>76 (0.9)    | 1-4/<br>44 (0.8)          |
| <b>Sore throat, n (%)</b>            |                          |                          |                          |                          |                           |
| Almost never and Sometimes           | 107 (2.1)/<br>206 (1.1)  | 100 (2.0)/<br>175 (1.0)  | 65 (1.8)/<br>116 (0.9)   | 12 (1.9)/<br>73 (0.9)    | 1-4/<br>46 (0.9)          |

|                                 |                            |                            |                          |                        |                        |
|---------------------------------|----------------------------|----------------------------|--------------------------|------------------------|------------------------|
| Often and Almost always         | 29 (0.6)/<br>24 (0.1)*     | 26 (0.5)/<br>21 (0.1)      | 17 (0.5)/<br>14 (0.1)*   | 1-4/<br>5 (0.1)        | 1-4/<br>0              |
| <b>Dizziness, n (%)</b>         |                            |                            |                          |                        |                        |
| Almost never and Sometimes      | 87 (1.7)/<br>128 (0.7)     | 71 (1.4)/<br>116 (0.6)     | 45 (1.2)/<br>69 (0.5)    | 8 (1.3)/<br>37 (0.4)   | 1-4/<br>21 (0.4)       |
| Often and Almost always         | 12 (0.2)/<br>13 (0.1)      | 10 (0.2)/<br>12 (0.1)      | 6 (0.2)/<br>8 (0.1)      | 0/<br>1-4              | 0/<br>1-4              |
| <b>Rashes, n (%)</b>            |                            |                            |                          |                        |                        |
| Almost never and Sometimes      | 166 (3.3)/<br>627 (3.4)    | 147 (2.9)/<br>484 (2.6)    | 94 (2.6)/<br>272 (2.9)   | 13 (2.1)/<br>143 (1.7) | 1-4/<br>86 (1.6)       |
| Often and Almost always         | 94 (1.9)/<br>536 (2.9)*    | 88 (1.7)/<br>508(2.8)      | 56 (1.5)/<br>345 (2.5)*  | 12 (1.9)/<br>176 (2.1) | 1-4/<br>115 (2.2)      |
| <b>Mood swings, n (%)</b>       |                            |                            |                          |                        |                        |
| Almost never and Sometimes      | 596 (11.9)/<br>2205 (12.0) | 537 (10.7)/<br>1949 (10.6) | 360 (9.9)/<br>1194 (8.8) | 57 (9.0)/<br>605 (7.3) | 14 (7.7)/<br>371 (7.0) |
| Often and Almost always         | 263 (5.2)/<br>1332 (7.3)*  | 256 (5.1)/<br>1292 (7.0)   | 176 (4.9)/<br>885 (6.5)  | 30 (4.8)/<br>488 (5.9) | 10 (5.5)/<br>294 (5.6) |
| <b>Nausea, n (%)</b>            |                            |                            |                          |                        |                        |
| Almost never and Sometimes      | 192 (3.8)/<br>459 (2.5)    | 178 (3.5)/<br>408 (2.2)    | 113 (3.1)/<br>278 (2.1)  | 12 (1.9)/<br>157 (1.9) | 6 (3.3)/<br>87 (1.7)   |
| Often and Almost always         | 39 (0.8)/<br>112 (0.6)     | 35 (0.7)/<br>100 (0.5)     | 26 (0.7)/<br>76 (0.6)    | 1-4/<br>48 (0.6)       | 0/<br>20 (0.4)         |
| <b>Fever, n (%)</b>             |                            |                            |                          |                        |                        |
| Almost never and Sometimes      | 61 (1.2)/<br>110 (0.6)     | 55 (1.1)/<br>100 (0.5)     | 35 (1.0)/<br>78 (0.6)    | 1-4/<br>50 (0.6)       | 0/<br>28 (0.5)         |
| Often and Almost always         | 9 (0.2)/<br>9 (0.1)        | 6 (0.1)/<br>9 (0.0)        | 1-4/<br>5 (0.0)          | 1-4/<br>1-4            | 0/<br>1-4              |
| <b>Loss of appetite, n (%)</b>  |                            |                            |                          |                        |                        |
| Almost never and Sometimes      | 248 (4.9)/<br>453 (2.5)    | 217 (4.3)/<br>487 (2.7)    | 136 (3.8)/<br>310 (2.3)  | 23 (3.7)/<br>167 (2.0) | 1-4/<br>106 (2.0)      |
| Often and Almost always         | 105 (2.1)/<br>278 (1.5)    | 96 (1.9)/<br>334 (1.8)     | 57 (1.6)/<br>205 (1.5)   | 7 (1.1)/<br>116 (1.4)  | 1-4/<br>70 (1.3)       |
| <b>Trouble breathing, n (%)</b> |                            |                            |                          |                        |                        |



|                                                     |                          |                          |                         |                        |                       |
|-----------------------------------------------------|--------------------------|--------------------------|-------------------------|------------------------|-----------------------|
| Almost never and Sometimes                          | 133 (2.6)/<br>212 (1.2)  | 110 (2.2)/<br>188 (1.0)  | 61 (1.7)/<br>115 (0.8)  | 7 (1.1)/<br>67 (0.8)   | 1-4/<br>41 (0.8)      |
| Often and Almost always                             | 31 (0.6)/<br>46 (0.3)*   | 29 (0.6)/<br>44 (0.2)    | 13 (0.4)/<br>27 (0.2)   | 1-4/<br>13 (0.2)       | 0/<br>1-4             |
| <b>Dark circles under the eyes, n (%)</b>           |                          |                          |                         |                        |                       |
| Almost never and Sometimes                          | 153 (3.0)/<br>431 (2.3)  | 137 (2.7)/<br>362 (2.0)  | 90 (2.5)/<br>222(1.6)   | 13 (2.1)/<br>122 (1.5) | 1-4/<br>77 (1.5)      |
| Often and Almost always                             | 87 (1.7)/<br>214 (1.2)   | 82 (1.6)/<br>200 (1.1)   | 57 (1.6)/<br>131 (1.0)  | 12 (1.9)/<br>77 (0.9)  | 7 (3.8)/<br>43 (0.8)  |
| <b>Palpitations, n (%)</b>                          |                          |                          |                         |                        |                       |
| Almost never and Sometimes                          | 82 (1.6)/<br>169 (0.9)   | 76 (1.5)/<br>148 (0.8)   | 44 (1.2)/<br>98 (0.7)   | 1-4/<br>58 (0.7)       | 1-4/<br>36 (0.7)      |
| Often and Almost always                             | 12 (0.2)/<br>21 (0.1)    | 9 (0.2)/<br>19 (0.1)     | 7 (0.2)/<br>14 (0.1)    | 1-4/<br>8 (0.1)        | 1-4/<br>5 (0.1)       |
| <b>Trouble remembering and concentrating, n (%)</b> |                          |                          |                         |                        |                       |
| Almost never and Sometimes                          | 394 (7.8)/<br>1287 (7.0) | 368 (7.3)/<br>1197 (6.5) | 249 (6.9)/<br>746 (5.5) | 53 (8.4)/<br>408 (4.9) | 11(6.0)/<br>249 (4.7) |
| Often and Almost always                             | 176 (3.5)/<br>760 (4.1)  | 174 (3.5)/<br>740 (4.0)  | 114 (3.1)/<br>547 (4.0) | 21 (3.3)/<br>333 (4.0) | 1-4/<br>201 (3.8)     |
| <b>Cold hands/feet, n (%)</b>                       |                          |                          |                         |                        |                       |
| Almost never and Sometimes                          | 72 (1.4)/<br>197 (1.1)   | 66 (1.3)/<br>176 (1.0)   | 42 (1.2)/<br>106 (0.8)  | 8 (1.3)/<br>48 (0.6)   | 1-4/<br>31 (0.6)      |
| Often and Almost always                             | 32 (0.6)/<br>101 (0.5)   | 32 (0.6)/<br>96 (0.5)    | 24 (0.7)/<br>66 (0.5)   | 1-4/<br>42 (0.5)       | 1-4/<br>23 (0.4)      |
| <b>Cough, n (%)</b>                                 |                          |                          |                         |                        |                       |
| Almost never and Sometimes                          | 187 (3.7)/<br>312 (1.7)  | 145 (2.9)/<br>242 (1.3)  | 92 (2.5)/<br>141 (1.0)  | 17 (2.7)/<br>84 (1.0)  | 5 (2.7)/<br>50 (0.9)  |
| Often and Almost always                             | 61 (1.2)/<br>119 (0.7)*  | 52 (1.0)/<br>101 (0.5)   | 30 (0.8)/<br>55 (0.4)   | 1-4/<br>28 (0.3)       | 0/<br>16 (0.3)        |
| <b>Chapped lips, n (%)</b>                          |                          |                          |                         |                        |                       |
| Almost never and Sometimes                          | 156 (3.1)/<br>420 (2.3)  | 130 (2.6)/<br>301 (1.6)  | 79 (2.2)/<br>163 (1.2)  | 13 (2.1)/<br>71 (0.9)  | 1-4/<br>44 (0.8)      |
| Often and Almost always                             | 57 (1.1)/                | 55 (1.1)/                | 38 (1.0)/               | 1-4/                   | 1-4/                  |

|                                        |                        |                        |                        |                      |                  |
|----------------------------------------|------------------------|------------------------|------------------------|----------------------|------------------|
|                                        | 184 (1.0)              | 12 (0.1)               | 6 (0.0)                | 1-4                  | 1-4              |
| <b>Dizziness when standing, n (%)</b>  |                        |                        |                        |                      |                  |
| Almost never and Sometimes             | 65 (1.3)/<br>103 (0.6) | 59 (1.2)/<br>91 (0.5)  | 38 (1.0)/<br>56 (0.4)  | 8 (1.3)/<br>26 (0.3) | 1-4/<br>16 (0.3) |
| Often and Almost always                | 7 (0.1)/<br>13 (0.1)   | 6 (0.1)/<br>12 (0.1)   | 5 (0.1)/<br>6 (0.0)    | 0/<br>1-4            | 0/<br>1-4        |
| <b>Light sensitivity, n (%)</b>        |                        |                        |                        |                      |                  |
| Almost never and Sometimes             | 89 (1.8)/<br>269 (1.5) | 84 (1.7)/<br>245 (1.3) | 57 (1.6)/<br>156 (1.2) | 8 (1.3)/<br>93 (1.1) | 1-4/<br>60 (1.1) |
| Often and Almost always                | 48 (1.0)/<br>152 (0.8) | 48 (1.0)/<br>146 (0.8) | 35 (1.0)/<br>101 (0.7) | 1-4/<br>57 (0.7)     | 0/<br>33 (0.6)   |
| <b>Discoloured fingers/toes, n (%)</b> |                        |                        |                        |                      |                  |
| Almost never and Sometimes             | 1-4/<br>15 (0.1)       | 1-4/<br>11 (0.1)       | 1-4/<br>9 (0.1)        | 1-4/<br>5 (0.1)      | 1-4/<br>1-4      |
| Often and Almost always                | 1-4/<br>6 (0.0)        | 1-4/<br>6 (0.0)        | 0/<br>1-4              | 0/<br>1-4            | 0/<br>1-4        |
| <b>Extreme paleness, n (%)</b>         |                        |                        |                        |                      |                  |
| Almost never and Sometimes             | 36 (0.7)/<br>114 (0.6) | 31 (0.6)/<br>101 (0.5) | 21 (0.6)/<br>59 (0.4)  | 5 (0.8)/<br>28 (0.3) | 0/<br>16 (0.3)   |
| Often and Almost always                | 17 (0.3)/<br>57 (0.3)  | 15 (0.3)/<br>53 (0.3)  | 6 (0.2)/<br>32 (0.2)   | 1-4/<br>20 (0.2)     | 1-4/<br>11 (0.2) |

\* p<0.0009. Differences in proportions between groups are tested at 2 and 6 months using Chi-Square tests.

**Table S3- Duration of all symptoms in cases and controls aged 12-14 years.**

|                                      | <b>At least 2 months</b>   | <b>At least 3 months</b> | <b>At least 6 months</b> | <b>At least 9 months</b> | <b>At least 12 months</b> |
|--------------------------------------|----------------------------|--------------------------|--------------------------|--------------------------|---------------------------|
|                                      | Cases/controls             | Cases/controls           | Cases/controls           | Cases/controls           | Cases/controls            |
| Total n                              | 2,857/10,789               | 2,857/10,789             | 2,367/8,213              | 494/5,047                | 83/2,976                  |
| <b>Stomach aches, n (%)</b>          |                            |                          |                          |                          |                           |
| Almost never and Sometimes           | 172 (6.0)/<br>483 (4.5)    | 153 (5.4)/<br>456 (4.2)  | 111 (4.7)/<br>178 (2.2)  | 23 (4.7)/<br>104 (2.0)   | 1-4/<br>0                 |
| Often and Almost always              | 60 (2.1)/<br>244 (2.3)     | 58 (2.0)/<br>228 (2.1)   | 50 (2.1)/<br>101 (1.2)   | 11 (2.2)/<br>66 (1.3)    | 1-4/<br>0                 |
| <b>Chest pain, n (%)</b>             |                            |                          |                          |                          |                           |
| Almost never and Sometimes           | 103 (3.6)/<br>162 (1.5)    | 90 (3.2)/<br>145 (1.3)   | 54 (2.3)/<br>59 (0.7)    | 11 (2.2)/<br>35 (0.7)    | 1-4<br>0/                 |
| Often and Almost always              | 23 (0.8)/<br>25 (0.2)*     | 20 (0.7)/<br>22 (0.2)    | 14 (0.6)/<br>6 (0.1)*    | 6 (1.2)/<br>1-4          | 0/<br>0                   |
| <b>Headache, n (%)</b>               |                            |                          |                          |                          |                           |
| Almost never and Sometimes           | 394 (13.3)/<br>838 (7.8)   | 370 (13.0)/<br>776 (7.2) | 268 (11.3)/<br>307 (3.8) | 39 (7.9)/<br>171 (3.4)   | 5 (6.0)/<br>0             |
| Often and Almost always              | 142 (5.0)/<br>346 (3.2)*   | 133 (4.7)/<br>330 (3.0)  | 106 (4.5)/<br>169 (2.0)* | 22 (4.5)/<br>98 (1.9)    | 1-4/<br>0                 |
| <b>Fatigue, n (%)</b>                |                            |                          |                          |                          |                           |
| Almost never and Sometimes           | 390 (13.7)/<br>1,021 (9.5) | 340 (11.9)/<br>906 (8.4) | 239 (10.1)/<br>341 (4.2) | 33 (6.7)/<br>177 (3.5)   | 1-4/<br>0                 |
| Often and Almost always              | 285 (10.0)/<br>807 (7.5)*  | 263 (9.2)/<br>744 (6.9)  | 199 (8.4)/<br>292 (3.5)* | 43 (8.7)/<br>170 (3.4)   | 8 (9.6)/<br>0             |
| <b>Pain in muscles/joints, n (%)</b> |                            |                          |                          |                          |                           |
| Almost never and Sometimes           | 223 (7.8)/<br>566 (5.2)    | 199 (7.0)/<br>519 (4.8)  | 134 (5.7)/<br>191 (2.3)  | 22 (4.5)/<br>119 (2.3)   | 1-4/<br>0                 |
| Often and Almost always              | 82 (2.9)/<br>218 (2.0)     | 77 (2.7)/<br>200 (1.9)   | 63 (2.7)/<br>75 (0.9)*   | 20 (4.0)/<br>37 (0.7)    | 5 (6.0)/<br>0             |
| <b>Sore throat, n (%)</b>            |                            |                          |                          |                          |                           |
| Almost never and Sometimes           | 89 (3.1)/<br>160 (1.5)     | 73 (2.6)/<br>137 (1.3)   | 55 (2.3)/<br>58 (0.7)    | 13 (2.6)/<br>37 (0.7)    | 0/<br>0                   |

|                                 |                            |                            |                          |                        |               |
|---------------------------------|----------------------------|----------------------------|--------------------------|------------------------|---------------|
| Often and Almost always         | 30 (1.1)/<br>20 (0.2)*     | 28 (1.0)/<br>20 (0.2)      | 18 (0.8)/<br>6 (0.1)*    | 1-4/<br>3 (0.1)        | 0/<br>0       |
| <b>Dizziness, n (%)</b>         |                            |                            |                          |                        |               |
| Almost never and Sometimes      | 166 (5.8)/<br>315 (2.9)    | 152 (5.3)/<br>273 (2.5)    | 108 (4.6)/<br>92 (1.1)   | 15 (3.0)/<br>0         | 1-4/<br>0     |
| Often and Almost always         | 50 (1.8)/<br>83 (0.8)*     | 47 (1.6)/<br>73 (0.7)      | 35 (1.5)/<br>24 (0.3)*   | 12 (2.4)/<br>0         | 1-4<br>0      |
| <b>Rashes, n (%)</b>            |                            |                            |                          |                        |               |
| Almost never and Sometimes      | 127 (4.4)/<br>311 (2.9)    | 110 (3.9)/<br>260 (2.4)    | 83 (3.5)/<br>108 (1.3)   | 12 (2.4)/<br>54 (1.1)  | 1-4/<br>0     |
| Often and Almost always         | 81 (2.8)/<br>293 (2.7)     | 76 (2.7)/<br>276 (2.5)     | 63 (2.7)/<br>100 (1.2)*  | 16 (3.2)/<br>51 (1.0)  | 5 (6.0)/<br>0 |
| <b>Mood swings, n (%)</b>       |                            |                            |                          |                        |               |
| Almost never and Sometimes      | 463 (16.2)/<br>1649 (15.3) | 434 (15.2)/<br>1485 (13.8) | 342 (14.4)/<br>480 (5.9) | 42 (8.5)/<br>269 (5.3) | 6 (7.2)/<br>0 |
| Often and Almost always         | 230 (8.1)/<br>1113 (10.3)* | 224 (7.8)/<br>1062 (9.8)   | 170 (7.2)/<br>475 (5.8)  | 40 (8.1)/<br>266 (5.2) | 5 (6.0)/<br>0 |
| <b>Nausea, n (%)</b>            |                            |                            |                          |                        |               |
| Almost never and Sometimes      | 145 (5.1)/<br>368 (3.4)    | 136 (4.8)/<br>328 (3.0)    | 101 (4.3)/<br>139 (1.7)  | 20 (4.0)/<br>85 (1.7)  | 1-4/<br>0     |
| Often and Almost always         | 38 (1.3)/<br>118 (1.1)     | 34 (1.2)/<br>104 (1.0)     | 27 (1.1)/<br>56 (0.7)    | 10 (2.0)/<br>36 (0.7)  | 1-4/<br>0     |
| <b>Fever, n (%)</b>             |                            |                            |                          |                        |               |
| Almost never and Sometimes      | 40 (1.4)/<br>60 (0.6)      | 36 (1.3)/<br>57 (0.5)      | 26 (1.1)/<br>32 (0.4)    | 1-4/<br>19 (0.4)       | 0/<br>0       |
| Often and Almost always         | 1-4<br>5 (0.05)            | 1-4<br>5 (0.05)            | 1-4/<br>1-4              | 0/<br>1-4              | 0/<br>0       |
| <b>Loss of appetite, n (%)</b>  |                            |                            |                          |                        |               |
| Almost never and Sometimes      | 157 (5.5)/<br>432 (4.0)    | 136 (4.8)/<br>372 (3.4)    | 91 (3.8)/<br>119 (1.4)   | 11 (2.2)/<br>65 (1.3)  | 1-4/<br>0     |
| Often and Almost always         | 93 (3.3)/<br>288 (2.7)     | 87 (3.0)/<br>269 (2.5)     | 56 (2.4)/<br>105 (1.3)*  | 13 (2.6)/<br>61 (1.2)  | 1-4/<br>0     |
| <b>Trouble breathing, n (%)</b> |                            |                            |                          |                        |               |

|                                                     |                            |                          |                          |                        |               |
|-----------------------------------------------------|----------------------------|--------------------------|--------------------------|------------------------|---------------|
| Almost never and Sometimes                          | 108 (3.8)/<br>178 (1.6)    | 91 (3.2)/<br>162 (1.5)   | 69 (2.9)/<br>72 (0.9)    | 11 (2.2)/<br>44 (0.9)  | 1-4/<br>0     |
| Often and Almost always                             | 37 (1.3)/<br>48 (0.4)*     | 35 (1.2)/<br>43 (0.4)    | 21 (0.9)/<br>18 (0.2)*   | 5 (1.0)/<br>9 (0.2)    | 1-4/<br>0     |
| <b>Dark circles under the eyes, n (%)</b>           |                            |                          |                          |                        |               |
| Almost never and Sometimes                          | 122 (4.3)/<br>354 (3.3)    | 107 (3.7)/<br>315 (2.9)  | 75 (3.2)/<br>102 (1.2)   | 15 (3.0)/<br>53 (1.0)  | 1-4/<br>0     |
| Often and Almost always                             | 63 (2.2)/<br>195 (1.8)     | 61 (2.1)/<br>186 (1.7)   | 44 (1.9)/<br>86 (1.1)    | 12 (2.4)/<br>54 (1.1)  | 1-4/<br>0     |
| <b>Palpitations, n (%)</b>                          |                            |                          |                          |                        |               |
| Almost never and Sometimes                          | 81 (2.8)/<br>161 (1.5)     | 71 (2.5)/<br>140 (1.3)   | 44 (1.9)/<br>51 (0.6)    | 12 (2.4)/<br>29 (0.6)  | 1-4/<br>0     |
| Often and Almost always                             | 19 (0.7)/<br>41 (0.4)      | 19 (0.7)/<br>39 (0.4)    | 14 (0.6)/<br>14 (0.2)*   | 0/<br>10 (0.2)         | 0/<br>0       |
| <b>Trouble remembering and concentrating, n (%)</b> |                            |                          |                          |                        |               |
| Almost never and Sometimes                          | 328 (11.5)/<br>1,002 (9.3) | 311 (10.9)/<br>926 (8.6) | 234 (9.9)/<br>364 (4.4)  | 36 (7.3)/<br>195 (0.4) | 5 (6.0)/<br>0 |
| Often and Almost always                             | 170 (6.0)/<br>697 (6.4)    | 167 (5.8)/<br>682 (6.3)  | 139 (5.9)/<br>297 (3.6)* | 29 (5.9)/<br>170 (3.3) | 5 (6.0)/<br>0 |
| <b>Cold hands/feet, n (%)</b>                       |                            |                          |                          |                        |               |
| Almost never and Sometimes                          | 86 (3.0)/<br>237 (2.2)     | 79 (2.8)/<br>220 (2.0)   | 65 (2.7)/<br>81 (1.0)    | 9 (1.8)/<br>52 (1.0)   | 1-4/<br>0     |
| Often and Almost always                             | 79 (2.8)/<br>272 (2.5)     | 77 (2.7)/<br>265 (2.5)   | 66 (2.8)/<br>106 (1.3)*  | 14 (2.8)/<br>63 (1.2)  | 1-4/<br>0     |
| <b>Cough, n (%)</b>                                 |                            |                          |                          |                        |               |
| Almost never and Sometimes                          | 91 (3.2)/<br>134 (1.2)     | 81 (2.8)/<br>113 (1.0)   | 55 (2.3)/<br>59 (0.7)    | 11 (2.2)/<br>38 (0.7)  | 1-4/<br>0     |
| Often and Almost always                             | 22 (0.8)/<br>33 (0.3)*     | 18 (0.6)/<br>28 (0.3)    | 12 (0.5)/<br>10 (0.1)*   | 1-4/<br>7 (0.1)        | 1-4/<br>0     |
| <b>Chapped lips, n (%)</b>                          |                            |                          |                          |                        |               |

|                                        |                         |                         |                        |                       |           |
|----------------------------------------|-------------------------|-------------------------|------------------------|-----------------------|-----------|
| Almost never and Sometimes             | 119 (4.2)/<br>302 (2.8) | 110 (3.9)/<br>252 (2.3) | 75 (3.2)/<br>97 (1.2)  | 11 (2.2)/<br>47 (0.9) | 1-4/<br>0 |
| Often and Almost always                | 59 (2.1)/<br>178 (1.6)  | 57 (2.0)/<br>159 (1.5)  | 44 (1.9)/<br>67 (0.8)* | 10 (2.0)/<br>37 (0.7) | 1-4/<br>0 |
| <b>Dizziness when standing, n (%)</b>  |                         |                         |                        |                       |           |
| Almost never and Sometimes             | 152 (5.3)/<br>308 (2.8) | 145 (5.1)/<br>278 (2.6) | 108 (4.6)/<br>80 (1.0) | 19 (3.8)/<br>41 (0.8) | 1-4<br>0  |
| Often and Almost always                | 50 (1.8)/<br>94 (0.9)*  | 48 (1.7)/<br>83 (0.8)   | 39 (1.6)/<br>30 (0.4)* | 10 (2.0)/<br>18 (0.4) | 1-4/<br>0 |
| <b>Light sensitivity, n (%)</b>        |                         |                         |                        |                       |           |
| Almost never and Sometimes             | 72 (2.5)/<br>219 (2.0)  | 68 (2.4)/<br>202 (1.9)  | 57 (2.4)/<br>88 (1.1)  | 1 (0.2)/<br>45 (0.9)  | 0/<br>0   |
| Often and Almost always                | 29 (1.0)/<br>146 (1.3)  | 28 (1.0)/<br>142 (1.3)  | 18 (0.8)/<br>68 (0.8)  | 7 (1.4)/<br>40 (0.8)  | 0/<br>0   |
| <b>Discoloured fingers/toes, n (%)</b> |                         |                         |                        |                       |           |
| Almost never and Sometimes             | 10 (0.4)/<br>26 (0.2)   | 9 (0.3)/<br>25 (0.2)    | 6 (0.3)/<br>8 (0.1)    | 0/<br>1-4             | 0/<br>0   |
| Often and Almost always                | 1-4/<br>10 (0.1)        | 1-4/<br>7 (0.1)         | 1-4/<br>1-4            | 1-4/<br>0             | 1-4/<br>0 |
| <b>Extreme paleness, n (%)</b>         |                         |                         |                        |                       |           |
| Almost never and Sometimes             | 29 (1.0)/<br>135 (1.2)  | 26 (0.9)/<br>111 (1.0)  | 17 (0.7)/<br>37 (0.4)  | 4 (0.8)/<br>15 (0.3)  | 0/<br>0   |
| Often and Almost always                | 17 (0.6)/<br>78 (0.7)   | 16 (0.6)/<br>74 (0.7)   | 10 (0.4)/<br>28 (0.3)  | 3 (0.6)/<br>18 (0.4)  | 1-4/<br>0 |

\*  $p < 0.0009$ . Differences in proportions between groups are tested at 2 and 6 months using Chi-Square tests.

**Table S4- Sex differences in proportion experiencing at least one symptom for at least 8 weeks**

|                                                                          | Cases       |             |                   | Controls    |             |                   |
|--------------------------------------------------------------------------|-------------|-------------|-------------------|-------------|-------------|-------------------|
|                                                                          | Girls       | Boys        | OR (95% CI)       | Girls       | Boys        | OR (95% CI)       |
| <b>Proportion reporting at least one symptom lasting 8 months, n (%)</b> |             |             |                   |             |             |                   |
| 0-3 years                                                                | 247 (39.1)  | 258 (36.9)  | 1.10 (0.88;1.38)  | 467 (26.2)  | 568 (28.1)  | 0.91 (0.79;1.05)  |
| 4-11 years                                                               | 1044 (38.6) | 1071 (36.2) | 1.14 (1.02;1.27)  | 3054 (34.6) | 3079 (32.8) | 1.15 (1.08;1.23)* |
| 12-14 years                                                              | 732 (52.7)  | 573 (39.6)  | 1.70 (1.47;1.97)* | 2388 (46.1) | 2010 (36.8) | 1.47 (1.36;1.59)* |

\* p<0.0009. Differences tested using logistic regression adjusted for age.

**Table S5- Sick leave during the past 12 months**

|                                                                    | 13 months-3 years               |                         | 4-11 years                      |                          | 12-14 years                     |                          |
|--------------------------------------------------------------------|---------------------------------|-------------------------|---------------------------------|--------------------------|---------------------------------|--------------------------|
|                                                                    | COVID population<br>(n = 1 344) | Controls<br>(n = 3 507) | COVID population<br>(n = 6 032) | Controls<br>(n = 18 372) | COVID population<br>(n = 3 516) | Controls<br>(n = 10 789) |
| <b>Sick leave past 12 months</b>                                   |                                 | <0.0001                 |                                 | <0.0001                  |                                 | <0.0001                  |
| 0-5 days                                                           | 405 (30.1)                      | 1,487 (42.4)            | 3,845 (63.7)                    | 14,420 (78.5)            | 1,987 (56.5)                    | 8,214 (76.1)             |
| 6-10 days                                                          | 351 (26.1)                      | 886 (25.3)              | 1,228 (20.4)                    | 2,446 (13.3)             | 823 (23.4)                      | 1,514 (14.0)             |
| 11-15 days                                                         | 206 (15.3)                      | 487 (13.9)              | 535 (8.9)                       | 807 (4.4)                | 389 (11.1)                      | 496 (4.6)                |
| 16 days -1 month                                                   | 296 (22.0)                      | 545 (15.5)              | 378 (6.3)                       | 587 (3.2)                | 266 (7.6)                       | 403 (3.7)                |
| more than 1 month                                                  | 86 (6.4)                        | 102 (2.9)               | 46 (0.8)                        | 112 (0.6)                | 51 (1.5)                        | 162 (1.5)                |
| <b>Absence from day-care/school because of illness<sup>a</sup></b> |                                 | <0.0001                 |                                 | <0.0001                  |                                 | <0.0001                  |
| 0-5 days                                                           | 480 (35.7)                      | 1,768 (50.4)            | 2,972 (67.5)                    | 11,108 (82.2)            | 2,264 (64.4)                    | 8,630 (80.0)             |
| 6-10 days                                                          | 352 (26.2)                      | 811 (23.1)              | 803 (18.2)                      | 1,480 (11.0)             | 706 (20.1)                      | 1,233 (11.4)             |
| 11-15 days                                                         | 191 (14.2)                      | 434 (12.4)              | 360 (8.2)                       | 470 (3.5)                | 317 (9.0)                       | 384 (3.6)                |
| 16 days -1 month                                                   | 272 (20.2)                      | 418 (11.9)              | 242 (5.5)                       | 333 (2.5)                | 185 (5.3)                       | 359 (3.3)                |
| more than 1 month                                                  | 49 (3.7)                        | 76 (2.2)                | 27 (0.6)                        | 117 (0.9)                | 44 (1.3)                        | 183 (1.7)                |
| <b>Sick leave perceived to be related to COVID</b>                 |                                 |                         |                                 |                          |                                 |                          |
| 0-5 days                                                           | 1,041 (77.5)                    | NA                      | 5,008 (83.0)                    | NA                       | 2,661 (75.7)                    | NA                       |
| 6-10 days                                                          | 178 (13.2)                      | NA                      | 672 (11.1)                      | NA                       | 550 (15.6)                      | NA                       |
| 11-15 days                                                         | 67 (4.9)                        | NA                      | 201 (3.3)                       | NA                       | 191 (5.4)                       | NA                       |



|                   |          |    |           |    |           |    |
|-------------------|----------|----|-----------|----|-----------|----|
| 16 days -1 month  | 41 (3·1) | NA | 127 (2·1) | NA | 86 (2·45) | NA |
| more than 1 month | 17 (1·3) | NA | 24 (0·4)  | NA | 27 (0·8)  | NA |

<sup>a</sup> For the age group 4-11 years the question about absence from school is only reported for children aged 8-11 due to a technical error in the questionnaire. The results percentages reported are calculated from 4,404 cases and 13,508 controls.

**Table S6 - Psychological and social symptoms in cases and controls<sup>a</sup>**

|                                                     | 4-11 years                   |                       | 12-14 years                  |                       |
|-----------------------------------------------------|------------------------------|-----------------------|------------------------------|-----------------------|
|                                                     | COVID population (n = 6,032) | Controls (n = 18,372) | COVID population (n = 3,516) | Controls (n = 10,789) |
| <b>Being scared</b>                                 |                              | <0.0001               |                              | <0.0001               |
| Almost never and Sometimes                          | 2,607 (43.2)                 | 9,841 (53.6)          | 828 (23.6)                   | 3,300 (30.6)          |
| Often and Almost always                             | 312 (5.2)                    | 1,027 (5.6)           | 117 (3.3)                    | 383 (3.5)             |
| <b>Feeling sad</b>                                  |                              | <0.001                |                              | <0.0001               |
| Almost never and Sometimes                          | 3,680 (61)                   | 13,697 (74.6)         | 1,411 (40.1)                 | 5,713 (53.0)          |
| Often and Almost always                             | 272 (4.5)                    | 997 (5.4)             | 182 (5.2)                    | 547 (5.1)             |
| <b>Trouble sleeping</b>                             |                              | <0.0001               |                              | <0.0001               |
| Almost never and Sometimes                          | 2,559 (42.4)                 | 9,567 (52.1)          | 1,260 (35.8)                 | 4,871 (45.1)          |
| Often and Almost always                             | 476 (7.9)                    | 1,642 (8.9)           | 275 (7.8)                    | 911 (8.4)             |
| <b>Feeling worried about what will happen to me</b> |                              | <0.001                |                              | <0.0001               |
| Almost never and Sometimes                          | 1,958 (32.5)                 | 7,432 (40.5)          | 967 (27.5)                   | 4,072 (37.7)          |
| Often and Almost always                             | 305 (5.1)                    | 1,206 (6.6)           | 209 (5.9)                    | 883 (8.2)             |
| <b>Trouble being with peers</b>                     |                              | <0.0001               |                              | <0.0001               |
| Almost never and Sometimes                          | 1,513 (25.1)                 | 6,175 (33.6)          | 779 (22.2)                   | 3,272 (30.3)          |
| Often and Almost always                             | 230 (3.8)                    | 846 (4.6)             | 177 (5.0)                    | 699 (6.5)             |
| <b>Others don't want to be friends</b>              |                              | <0.001                |                              | <0.0001               |
| Almost never and Sometimes                          | 1,245 (20.6)                 | 4,777 (26)            | 673 (19.1)                   | 2,801 (26.0)          |
| Often and Almost always                             | 66 (1.1)                     | 370 (2)               | 88 (2.5)                     | 371 (3.4)             |

|                            |              |              |            |              |
|----------------------------|--------------|--------------|------------|--------------|
| <b>Being teased</b>        |              | <0.0001      |            | <0.0001      |
| Almost never and Sometimes | 1,445 (23.9) | 5,844 (31.8) | 557 (15.8) | 2,432 (22.5) |
| Often and Almost always    | 65 (1.1)     | 262 (1.4)    | 42 (1.2)   | 161 (1.5)    |

<sup>a</sup> Results are only reported for the age groups 5-11 years and 12-14 years as children in the age group 0-4 years were not asked similar questions.

**Table S7 - Demographic and clinical profile for the long COVID groups<sup>a</sup> across age groups**

|                                         | <b>0-3 years</b>   | <b>4-11 years</b> | <b>12-14 years</b>    |
|-----------------------------------------|--------------------|-------------------|-----------------------|
| n (% of total COVID population)         | n = 427<br>(31.2%) | n = 1,505 (26.5%) | n = 1,077<br>(32.5 %) |
| Age, median (range)                     | 2.1 (0.2-4.9)      | 8.9 (4.0-12.9)    | 13.6 (12.0-15.9)      |
| Missing n, (%)                          | 7 (1.6)            | 11 (0.7)          | 6 (0.6)               |
| <b>Sex n, (%)</b>                       |                    |                   |                       |
| Female                                  | 199 (46.6)         | 766 (50.9)        | 616 (57.5)            |
| Male                                    | 221 (51.8)         | 728 (48.3)        | 455 (42.5)            |
| Missing n, (%)                          | 7 (1.6)            | 11 (0.7)          | 6 (0.6)               |
| <b>BMI n, (%)<sup>b</sup></b>           |                    |                   |                       |
| Underweight                             | 15 (6.7)           | 134 (8.9)         | 45 (4.2)              |
| Normal weight                           | 182 (80.9)         | 1,020 (67.8)      | 671 (62.3)            |
| Overweight                              | 12 (5.3)           | 258 (17.1)        | 164 (15.2)            |
| Obesity                                 | 7 (3.1)            | 88 (5.9)          | 41 (4.5)              |
| Missing n, (%)                          | 9 (4.0)            | 5 (0.3)           | 6 (0.6)               |
| <b>Pre-existing co-morbidity n, (%)</b> |                    |                   |                       |
| Asthma                                  | 24 (5.6)           | 113 (7.5)         | 80 (7.4)              |
| Allergy                                 | 15 (3.5)           | 186 (12.4)        | 203 (18.9)            |
| Eczema                                  | 50 (11.7)          | 139 (9.2)         | 92 (8.5)              |
| Tics                                    | 0 (0.0)            | 31 (2.1)          | 25 (2.3)              |

|                                                   |            |            |             |
|---------------------------------------------------|------------|------------|-------------|
| Colic                                             | 10 (2.3)   | 7 (0.5)    |             |
| ADHD/ADS                                          | NA         | 28 (1.9)   | 44 (4.1)    |
| Epstein Bar                                       | NA         | <5         | 5 (0.5)     |
| Arthritis                                         | NA         | 6 (0.4)    | <5          |
| Myalgic encephalomyelitis/Cronic fatigue syndrome | NA         | <5         | <5          |
| Autism                                            | NA         | 22 (1.5)   | 32 (3.0)    |
| Hyper-mobility                                    | NA         | 25 (1.7)   | 34 (3.2)    |
| HPV virus                                         | NA         | 0 (0.0)    | 0 (0.0)     |
| OCD/anxiety/depression                            | NA         | 17 (1.1)   | 38 (3.5)    |
| Other                                             | 15 (3.5)   | 69 (4.6)   | 57 (5.3)    |
| <b>Time since positive COVID-19 test n, (%)</b>   |            |            |             |
| 1 month                                           | <5         | 6 (0.4)    | <5          |
| 1-3 months                                        | 54 (12.7)  | 190 (12.6) | 151 (14.02) |
| 4-6 months                                        | 86 (20.1)  | 334 (22.2) | 149 (13.8)  |
| 7-9 months                                        | 222 (52.0) | 805 (53.5) | 608 (56.5)  |
| 10-12 months                                      | 41 (9.6)   | 123 (8.2)  | 139 (12.9)  |
| +12 months                                        | 22 (5.2)   | 47 (3.1)   | 24 (2.4)    |
| <b>COVID-19 course n, (%)</b>                     |            |            |             |
| No symptoms                                       | 156 (36.5) | 579 (38.5) | 258 (23.9)  |
| Mild symptoms                                     | 248 (58.1) | 861 (57.2) | 762 (70.8)  |
| Severe symptoms                                   | 23 (5.4)   | 65 (4.3)   | 57 (5.3)    |

<sup>a</sup> When investigating the case group only, long COVID symptoms were defined as symptoms not experienced before COVID-19 infection and present 8 weeks after the positive test.

<sup>b</sup> BMI is not reported for children in the age group 0-2 years old (n=202).

**Table S8 – Symptoms in the long COVID groups**

|                                                                                    | 0-3 years                  | 4-11 years                 | 12-14 years                |
|------------------------------------------------------------------------------------|----------------------------|----------------------------|----------------------------|
| <b>Proportion of cases suspecting that new symptom was related to COVID, n (%)</b> | 261 (19.1)                 | 1091 (19.2)                | 815 (24.6)                 |
| <b>Proportion of cases reporting at least one symptom lasting 12 months, n (%)</b> | 8 (12.0)                   | 19 (10.4)                  | 14 (16.9)                  |
| <b>Mean number of new symptoms lasting 2 months,</b><br>mean (SD)<br>median (IQR)  | 0.7 (1.5)<br>0.0 (0.0-1.0) | 0.7 (1.6)<br>0.0 (0.0-0.0) | 1.0 (2.2)<br>2.0 (0.0-1.0) |
| <b>Mean number of new symptoms by COVID-19 course:</b>                             |                            |                            |                            |
| <b>No symptoms</b><br>mean (SD)<br>median (IQR)                                    | 0.4 (1.0)<br>0.0 (0.0-0.0) | 0.3 (1.0)<br>0.0 (0.0-0.0) | 0.4 (1.2)<br>0.0 (0.0-9.0) |
| <b>Mild symptoms</b><br>mean (SD)<br>median (IQR)                                  | 1.0 (1.7)<br>0.0 (0.0-1.0) | 1.1 (2.0)<br>0.0 (0.0-1.0) | 1.4 (2.4)<br>0.0 (0.0-2.0) |
| <b>Severe symptoms</b><br>mean (SD)<br>median (IQR)                                | 1.7 (2.5)<br>0.0 (0.0-3.0) | 3.8 (4.1)<br>2.0 (0.0-6.0) | 3.8 (4.6)<br>2.0 (0.0-6.0) |

**Table S9 - Long COVID-19 symptoms (prevalence and duration) among cases with new symptoms divided by age group**

|                                       | 0-3 years                     |                                |                                |                              | 4-11 years                    |                                |                                |                                | 12-14 years                   |                                |                                |                                |
|---------------------------------------|-------------------------------|--------------------------------|--------------------------------|------------------------------|-------------------------------|--------------------------------|--------------------------------|--------------------------------|-------------------------------|--------------------------------|--------------------------------|--------------------------------|
|                                       | At least 1 month<br>n = 1,417 | At least 2 months<br>n = 1,349 | At least 3 months<br>n = 1,194 | At least 6 months<br>n = 899 | At least 1 month<br>n = 5,967 | At least 2 months<br>n = 5,692 | At least 3 months<br>n = 5,023 | At least 6 months<br>n = 3,614 | At least 1 month<br>n = 3,458 | At least 2 months<br>n = 3,281 | At least 3 months<br>n = 2,857 | At least 6 months<br>n = 2,367 |
| <b>Stomach aches, n (%)</b>           |                               |                                |                                |                              |                               |                                |                                |                                |                               |                                |                                |                                |
| Almost never and Sometimes            | 58 (4.1)                      | 36 (2.7)                       | 24 (2.0)                       | 14 (1.6)                     | 208 (3.5)                     | 159 (2.8)                      | 125 (2.5)                      | 73 (2.0)                       | 103 (3.0)                     | 85 (2.6)                       | 71 (2.5)                       | 44 (1.9)                       |
| Often and Almost always               | 24 (1.7)                      | 22 (1.6)                       | 16 (1.3)                       | 5 (0.6)                      | 85 (1.4)                      | 84 (1.5)                       | 72 (1.4)                       | 45 (1.2)                       | 39 (1.1)                      | 30 (0.9)                       | 30 (1.1)                       | 24 (1.0)                       |
| <b>Chest pain, n (%) <sup>a</sup></b> |                               |                                |                                |                              |                               |                                |                                |                                |                               |                                |                                |                                |
| Almost never and Sometimes            | <5                            | <5                             | <5                             | <5                           | 105 (1.8)                     | 90 (1.6)                       | 68 (1.3)                       | 41 (1.1)                       | 108 (3.1)                     | 79 (2.4)                       | 63 (2.2)                       | 37 (1.6)                       |
| Often and Almost always               | 0 (0.0)                       | 0 (0.0)                        | 0 (0.0)                        | 0 (0.0)                      | 11 (0.2)                      | 10 (0.2)                       | 5 (0.1)                        | <5                             | 21 (0.6)                      | 20 (0.6)                       | 16 (0.6)                       | 10 (0.4)                       |
| <b>Headache, n (%) <sup>a</sup></b>   |                               |                                |                                |                              |                               |                                |                                |                                |                               |                                |                                |                                |
| Almost never and Sometimes            | 15 (1.7)                      | 11 (1.3)                       | 9 (1.2)                        | <5                           | 391 (6.5)                     | 297 (5.2)                      | 245 (4.9)                      | 150 (4.1)                      | 252 (7.3)                     | 193 (5.9)                      | 162 (5.7)                      | 107 (4.5)                      |
| Often and Almost always               | 0 (0.0)                       | 0 (0.0)                        | 0 (0.0)                        | 0 (0.0)                      | 98 (1.6)                      | 88 (1.5)                       | 76 (1.5)                       | 53 (1.5)                       | 90 (2.6)                      | 83 (2.5)                       | 72 (2.5)                       | 56 (2.4)                       |
| <b>Fatigue, n (%)</b>                 |                               |                                |                                |                              |                               |                                |                                |                                |                               |                                |                                |                                |
| Almost never and Sometimes            | 92 (6.5)                      | 60 (4.4)                       | 44 (3.7)                       | 16 (1.8)                     | 380 (6.4)                     | 280 (4.9)                      | 224 (4.4)                      | 130 (3.6)                      | 294 (8.5)                     | 218 (6.6)                      | 163 (5.7)                      | 99 (4.2)                       |
| Often and Almost always               | 41 (2.9)                      | 37 (2.7)                       | 30 (2.5)                       | 15 (1.7)                     | 200 (3.3)                     | 173 (3.0)                      | 133 (2.6)                      | 79 (2.2)                       | 230 (6.7)                     | 210 (6.4)                      | 185 (6.5)                      | 135 (5.7)                      |
| <b>Pain in muscles/joints, n (%)</b>  |                               |                                |                                |                              |                               |                                |                                |                                |                               |                                |                                |                                |
| Almost never and Sometimes            | 29 (2.0)                      | 21 (1.6)                       | 17 (1.4)                       | 8 (0.9)                      | 214 (3.6)                     | 168 (2.9)                      | 134 (2.7)                      | 80 (2.2)                       | 151 (4.4)                     | 113 (3.4)                      | 88 (3.1)                       | 52 (2.2)                       |
| Often and Almost always               | <5                            | <5                             | <5                             | <5                           | 63 (1.1)                      | 52 (0.9)                       | 45 (0.9)                       | 30 (0.8)                       | 52 (1.5)                      | 52 (1.6)                       | 48 (1.7)                       | 34 (1.4)                       |



|                                       |             |             |             |             |              |              |              |             |              |              |              |             |
|---------------------------------------|-------------|-------------|-------------|-------------|--------------|--------------|--------------|-------------|--------------|--------------|--------------|-------------|
| <b>Sore throat, n (%)<sup>a</sup></b> |             |             |             |             |              |              |              |             |              |              |              |             |
| Almost never and Sometimes            | 14<br>(1.6) | 9 (1.0)     | 5 (0.6)     | <5          | 82<br>(1.4)  | 56<br>(1.0)  | 48<br>(1.0)  | 25<br>(0.7) | 76<br>(2.2)  | 46<br>(1.4)  | 32<br>(1.1)  | 25<br>(1.1) |
| Often and Almost always               | <5          | <5          | <5          | 0 (0.0)     | 30<br>(0.5)  | 24<br>(0.4)  | 19<br>(0.4)  | 14<br>(0.4) | 22<br>(0.6)  | 18<br>(0.5)  | 15<br>(0.5)  | 8 (0.3)     |
| <b>Dizziness, n (%)<sup>a</sup></b>   |             |             |             |             |              |              |              |             |              |              |              |             |
| Almost never and Sometimes            | <5          | <5          | <5          | <5          | 97<br>(1.6)  | 78<br>(1.4)  | 56<br>(1.1)  | 29<br>(0.8) | 146<br>(4.2) | 120<br>(3.7) | 95<br>(3.3)  | 64<br>(2.7) |
| Often and Almost always               | 0 (0.0)     | 0 (0.0)     | 0 (0.0)     | 0 (0.0)     | 16<br>(0.3)  | 14<br>(0.2)  | 9 (0.2)      | 5 (0.1)     | 41<br>(1.2)  | 37<br>(1.1)  | 32<br>(1.1)  | 26<br>(1.1) |
| <b>Rashes, n (%)</b>                  |             |             |             |             |              |              |              |             |              |              |              |             |
| Almost never and Sometimes            | 48<br>(3.4) | 27<br>(2.0) | 20<br>(1.7) | 11<br>(1.2) | 83<br>(1.4)  | 60<br>(1.1)  | 47<br>(0.9)  | 21<br>(0.6) | 57<br>(1.6)  | 48<br>(1.5)  | 33<br>(1.2)  | 21<br>(0.9) |
| Often and Almost always               | 29<br>(2.0) | 23<br>(1.7) | 20<br>(1.7) | 10<br>(1.1) | 36<br>(0.6)  | 34<br>(0.6)  | 24<br>(0.5)  | 16<br>(0.4) | 21<br>(0.6)  | 21<br>(0.6)  | 18<br>(0.6)  | 10<br>(0.4) |
| <b>Mood swings, n (%)</b>             |             |             |             |             |              |              |              |             |              |              |              |             |
| Almost never and Sometimes            | 59<br>(4.2) | 40<br>(3.0) | 31<br>(2.6) | 16<br>(1.8) | 219<br>(3.7) | 185<br>(3.2) | 141<br>(2.8) | 85<br>(2.3) | 140<br>(4.0) | 117<br>(3.6) | 100<br>(3.5) | 70<br>(3.0) |
| Often and Almost always               | 41<br>(2.9) | 34<br>(2.5) | 29<br>(2.4) | 12<br>(1.3) | 103<br>(1.7) | 95<br>(1.7)  | 86<br>(1.7)  | 54<br>(1.5) | 76<br>(2.2)  | 74<br>(2.3)  | 69<br>(2.4)  | 51<br>(2.2) |
| <b>Nausea, n (%)</b>                  |             |             |             |             |              |              |              |             |              |              |              |             |
| Almost never and Sometimes            | 22<br>(1.6) | 14<br>(1.0) | 10<br>(0.8) | <5          | 131<br>(2.2) | 101<br>(1.8) | 87<br>(1.7)  | 51<br>(1.4) | 103<br>(3.0) | 81<br>(2.5)  | 71<br>(2.5)  | 47<br>(2.0) |
| Often and Almost always               | <5          | <5          | <5          | <5          | 33<br>(0.6)  | 28<br>(0.5)  | 20<br>(0.4)  | 14<br>(0.4) | 32<br>(0.9)  | 29<br>(0.9)  | 24<br>(0.8)  | 19<br>(0.8) |
| <b>Fever, n (%)</b>                   |             |             |             |             |              |              |              |             |              |              |              |             |
| Almost never and Sometimes            | 33<br>(2.3) | 28<br>(2.1) | 22<br>(1.8) | 15<br>(1.7) | 37<br>(0.6)  | 28<br>(0.5)  | 24<br>(0.5)  | 12<br>(0.3) | 29<br>(0.8)  | 22<br>(0.7)  | 21<br>(0.7)  | 14<br>(0.6) |
| Often and Almost always               | 17<br>(1.2) | 16<br>(1.2) | 14<br>(1.2) | 9 (1.0)     | 7 (0.1)      | 7 (0.1)      | <5           | <5          | 6 (0.2)      | 5 (0.2)      | <5           | <5          |
| <b>Loss of appetite, n (%)</b>        |             |             |             |             |              |              |              |             |              |              |              |             |
| Almost never and Sometimes            | 38<br>(2.7) | 27<br>(2.0) | 21<br>(1.8) | 7 (0.8)     | 182<br>(3.1) | 133<br>(2.3) | 98<br>(2.0)  | 53<br>(1.5) | 163<br>(4.7) | 121<br>(3.7) | 92<br>(3.2)  | 58<br>(2.5) |
| Often and Almost always               | 23<br>(1.6) | 21<br>(1.6) | 16<br>(1.3) | 7 (0.8)     | 83<br>(1.4)  | 75<br>(1.3)  | 61<br>(1.2)  | 34<br>(0.9) | 92<br>(2.7)  | 83<br>(2.5)  | 77<br>(2.7)  | 48<br>(2.0) |

|                                                                 |             |             |             |             |              |              |              |             |              |              |              |             |
|-----------------------------------------------------------------|-------------|-------------|-------------|-------------|--------------|--------------|--------------|-------------|--------------|--------------|--------------|-------------|
| <b>Trouble breathing, n (%)</b>                                 |             |             |             |             |              |              |              |             |              |              |              |             |
| Almost never and Sometimes                                      | 37<br>(2.6) | 30<br>(2.2) | 24<br>(2.0) | 15<br>(1.7) | 94<br>(1.6)  | 75<br>(1.3)  | 52<br>(1.0)  | 29<br>(0.8) | 92<br>(2.7)  | 75<br>(2.3)  | 56<br>(2.0)  | 40<br>(1.7) |
| Often and Almost always                                         | 14<br>(1.0) | 13<br>(1.0) | 12<br>(1.0) | 7 (0.8)     | 25<br>(0.4)  | 24<br>(0.4)  | 21<br>(0.4)  | 11<br>(0.3) | 32<br>(0.9)  | 31<br>(0.9)  | 26<br>(0.9)  | 16<br>(0.7) |
| <b>Dark circles under the eyes, n (%)</b>                       |             |             |             |             |              |              |              |             |              |              |              |             |
| Almost never and Sometimes                                      | 28<br>(2.0) | 19<br>(1.4) | 14<br>(1.2) | 9 (1.0)     | 110<br>(1.8) | 77<br>(1.3)  | 59<br>(1.2)  | 40<br>(1.1) | 74<br>(2.1)  | 65<br>(2.0)  | 49<br>(1.7)  | 33<br>(1.4) |
| Often and Almost always                                         | 12<br>(0.8) | 11<br>(0.8) | 10<br>(0.8) | 7 (0.8)     | 47<br>(0.8)  | 44<br>(0.8)  | 38<br>(0.8)  | 25<br>(0.7) | 25<br>(0.7)  | 22<br>(0.7)  | 21<br>(0.7)  | 15<br>(0.6) |
| <b>Palpitations, n (%)</b>                                      |             |             |             |             |              |              |              |             |              |              |              |             |
| Almost never and Sometimes                                      | <5          | <5          | <5          | 0 (0.0)     | 75<br>(1.3)  | 63<br>(1.1)  | 53<br>(1.1)  | 31<br>(0.9) | 65<br>(1.9)  | 57<br>(1.7)  | 47<br>(1.6)  | 30<br>(1.3) |
| Often and Almost always                                         | <5          | <5          | <5          | <5          | 11<br>(0.2)  | 11<br>(0.2)  | 7 (0.1)      | 5 (0.1)     | 15<br>(0.4)  | 15<br>(0.5)  | 15<br>(0.5)  | 10<br>(0.4) |
| <b>Trouble remembering and concentrating, n (%)<sup>a</sup></b> |             |             |             |             |              |              |              |             |              |              |              |             |
| Almost never and Sometimes                                      | 13<br>(1.5) | 12<br>(1.4) | 10<br>(1.3) | 7 (1.2)     | 176<br>(2.9) | 149<br>(2.6) | 131<br>(2.6) | 87<br>(2.4) | 152<br>(4.4) | 128<br>(3.9) | 113<br>(4.0) | 76<br>(3.2) |
| Often and Almost always                                         | <5          | <5          | <5          | <5          | 55<br>(0.9)  | 53<br>(0.9)  | 49<br>(1.0)  | 34<br>(0.9) | 73<br>(2.1)  | 68<br>(2.1)  | 61<br>(2.1)  | 52<br>(2.2) |
| <b>Cold hands/feet, n (%)</b>                                   |             |             |             |             |              |              |              |             |              |              |              |             |
| Almost never and Sometimes                                      | 25<br>(1.8) | 20<br>(1.5) | 17<br>(1.4) | 7 (0.8)     | 38<br>(0.6)  | 33<br>(0.6)  | 27<br>(0.5)  | 17<br>(0.5) | 43<br>(1.2)  | 41<br>(1.2)  | 35<br>(1.2)  | 25<br>(1.1) |
| Often and Almost always                                         | 5 (0.4)     | 5 (0.4)     | <5          | <5          | 11<br>(0.2)  | 10<br>(0.2)  | 8 (0.2)      | 8 (0.2)     | 27<br>(0.8)  | 25<br>(0.8)  | 23<br>(0.8)  | 21<br>(0.9) |
| <b>Cough, n (%)</b>                                             |             |             |             |             |              |              |              |             |              |              |              |             |
| Almost never and Sometimes                                      | 84<br>(5.9) | 61<br>(4.5) | 47<br>(3.9) | 17<br>(1.9) | 122<br>(2.0) | 84<br>(1.5)  | 51<br>(1.0)  | 30<br>(0.8) | 83<br>(2.4)  | 55<br>(1.7)  | 42<br>(1.5)  | 24<br>(1.0) |
| Often and Almost always                                         | 67<br>(4.7) | 54<br>(4.0) | 42<br>(3.5) | 23<br>(2.6) | 51<br>(0.9)  | 43<br>(0.8)  | 34<br>(0.7)  | 19<br>(0.5) | 22<br>(0.6)  | 18<br>(0.5)  | 14<br>(0.5)  | 8 (0.3)     |
| <b>Chapped lips, n (%)</b>                                      |             |             |             |             |              |              |              |             |              |              |              |             |

|                                                   |          |          |         |         |          |          |          |          |           |          |          |          |
|---------------------------------------------------|----------|----------|---------|---------|----------|----------|----------|----------|-----------|----------|----------|----------|
| Almost never and Sometimes                        | 10 (0.7) | 8 (0.6)  | 5 (0.4) | <5      | 69 (1.2) | 50 (0.9) | 35 (0.7) | 21 (0.6) | 46 (1.3)  | 33 (1.0) | 27 (0.9) | 19 (0.8) |
| Often and Almost always                           | <5       | 0 (0.0)  | 0 (0.0) | 0 (0.0) | 29 (0.5) | 22 (0.4) | 21 (0.4) | 17 (0.5) | 21 (0.6)  | 19 (0.6) | 18 (0.6) | 13 (0.5) |
| <b>Dizziness when standing, n (%)<sup>a</sup></b> |          |          |         |         |          |          |          |          |           |          |          |          |
| Almost never and Sometimes                        | <5       | <5       | <5      | 0 (0.0) | 72 (1.2) | 59 (1.0) | 48 (1.0) | 31 (0.9) | 104 (3.0) | 91 (2.8) | 81 (2.8) | 60 (2.5) |
| Often and Almost always                           | 0 (0.0)  | 0 (0.0)  | 0 (0.0) | 0 (0.0) | 10 (0.2) | 8 (0.1)  | 6 (0.2)  | 6 (0.2)  | 45 (1.3)  | 40 (1.2) | 35 (1.2) | 25 (1.1) |
| <b>Light sensitivity, n (%)<sup>a</sup></b>       |          |          |         |         |          |          |          |          |           |          |          |          |
| Almost never and Sometimes                        | 11 (1.2) | 11 (1.3) | 9 (1.2) | 5 (0.9) | 42 (0.7) | 42 (0.7) | 36 (0.7) | 25 (0.7) | 39 (1.1)  | 29 (0.9) | 25 (0.9) | 17 (0.7) |
| Often and Almost always                           | 0 (0.0)  | 0 (0.0)  | 0 (0.0) | 0 (0.0) | 18 (0.3) | 18 (0.3) | 16 (0.3) | 9 (0.2)  | 19 (0.5)  | 18 (0.5) | 17 (0.6) | 11 (0.5) |
| <b>Discoloured fingers/toes, n (%)</b>            |          |          |         |         |          |          |          |          |           |          |          |          |
| Almost never and Sometimes                        | 0 (0.0)  | 0 (0.0)  | 0 (0.0) | 0 (0.0) | <5       | <5       | <5       | <5       | 7 (0.2)   | 6 (0.2)  | 5 (0.2)  | <5       |
| Often and Almost always                           | <5       | <5       | <5      | <5      | <5       | <5       | 0 (0.0)  | 0 (0.0)  | <5        | <5       | <5       | <5       |
| <b>Extreme paleness, n (%)</b>                    |          |          |         |         |          |          |          |          |           |          |          |          |
| Almost never and Sometimes                        | <5       | <5       | <5      | <5      | 27 (0.5) | 22 (0.4) | 18 (0.4) | 13 (0.4) | 27 (0.8)  | 17 (0.5) | 14 (0.5) | 5 (0.2)  |
| Often and Almost always                           | 5 (0.4)  | <5       | <5      | <5      | 12 (0.2) | 10 (0.2) | 7 (0.1)  | <5       | 15 (0.4)  | 15 (0.5) | 13 (0.5) | 7 (0.3)  |

<sup>a</sup> These symptoms are only reported for children aged 2-4 years. Children aged 0-2 years were not asked about these symptoms as they would not be appropriate to answer for that age group. Thus, percentages shown are calculated out of 896 cases at 1 month, 861 cases at 2 months, 773 cases at 3 months and 587 cases at 6 months.

**Table S10 - Sick days during the past 12 months for the long COVID groups**

|                                                                     | 13 months -<br>4 years | 5-11 years   | 12-14 years |
|---------------------------------------------------------------------|------------------------|--------------|-------------|
|                                                                     | n = 391                | n = 1,505    | n = 1,077   |
| <b>Sick leave past 12 months</b>                                    |                        |              |             |
| 0-5 days                                                            | 89 (22.8)              | 703 (46.7)   | 411 (38.2)  |
| 6-10 days                                                           | 83 (21.2)              | 370 (24.6)   | 283 (26.3)  |
| 11-15 days                                                          | 53 (13.6)              | 191 (12.7)   | 181 (16.81) |
| 16 days -1 month                                                    | 116 (29.7)             | 210 (13.9)   | 161 (15.0)  |
| more than 1 month                                                   | 50 (12.8)              | 31 (2.1)     | 41 (3.8)    |
| <b>Absence from day-care/school because of illness <sup>a</sup></b> |                        |              |             |
| 0-5 days                                                            | 116 (29.7)             | 589 (52.6)   | 516 (47.9)  |
| 6-10 days                                                           | 84 (21.5)              | 260 (23.2)   | 273 (25.4)  |
| 11-15 days                                                          | 50 (12.8)              | 135 (12.1)   | 148 (13.7)  |
| 16 days -1 month                                                    | 110 (28.1)             | 120 (10.7)   | 111 (10.3)  |
| more than 1 month                                                   | 31 (7.9)               | 16 (1.4)     | 29 (2.7)    |
| <b>Sick leave perceived to be related to COVID</b>                  |                        |              |             |
| 0-5 days                                                            | 247 (63.2)             | 1,032 (68.6) | 623 (57.9)  |
| 6-10 days                                                           | 66 (16.9)              | 266 (17.7)   | 245 (22.8)  |
| 11-15 days                                                          | 35 (9.0)               | 102 (6.8)    | 117 (10.9)  |
| 16 days -1 month                                                    | 29 (7.4)               | 90 (5.9)     | 69 (6.4)    |
| more than 1 month                                                   | 14 (3.6)               | 15 (1.0)     | 23 (2.1)    |

<sup>a</sup> For the age group 5-11 years the question about absence from school is only reported for children aged 8-11 due to a technical error in the questionnaire. The results percentages reported are calculated from 1120 cases.

**Table S11 - Questionnaire LongCOVIDKidsDK**

| <b>Questionnaire - LongCOVIDKidsDK</b> |                                                                                                                                                                                                                                                                                                                                                                                                                                                                                                                                                                                                                                                                                                                                                                                                                                                                                                                                                                                    |
|----------------------------------------|------------------------------------------------------------------------------------------------------------------------------------------------------------------------------------------------------------------------------------------------------------------------------------------------------------------------------------------------------------------------------------------------------------------------------------------------------------------------------------------------------------------------------------------------------------------------------------------------------------------------------------------------------------------------------------------------------------------------------------------------------------------------------------------------------------------------------------------------------------------------------------------------------------------------------------------------------------------------------------|
| <b>Subject</b>                         | <b>Items</b>                                                                                                                                                                                                                                                                                                                                                                                                                                                                                                                                                                                                                                                                                                                                                                                                                                                                                                                                                                       |
| General health                         | Weight<br>Height<br>Weight loss<br>Unintended weight gain<br>Comorbidity <ul style="list-style-type: none"> <li>- Asthma</li> <li>- Allergy</li> <li>- Eczema</li> <li>- Tics</li> <li>- ADHD/ADS</li> <li>- Epstein Bar Virus</li> <li>- Arthritis</li> <li>- ME/CFC</li> <li>- Autism</li> <li>- Hyper-mobility</li> <li>- Human Papilloma Virus</li> <li>- OCD/anxiety/depression</li> </ul>                                                                                                                                                                                                                                                                                                                                                                                                                                                                                                                                                                                    |
| SARS CoV-2 infection (cases only)      | Month and year of positive SARS CoV-2 test<br>Severity of perceived acute COVID-19 symptom burden <ul style="list-style-type: none"> <li>- No symptoms</li> <li>- Mild symptoms</li> <li>- Severe symptoms</li> </ul>                                                                                                                                                                                                                                                                                                                                                                                                                                                                                                                                                                                                                                                                                                                                                              |
| Sick days                              | Number of sick days the past 12 months<br>Number of sick days the past 12 months related to SARS CoV-2 (cases only)<br>Absence from school because of illness                                                                                                                                                                                                                                                                                                                                                                                                                                                                                                                                                                                                                                                                                                                                                                                                                      |
| CSSI                                   | Headache<br>Fainting or dizziness<br>Pain in your heart or chest<br>Feeling low in energy or slowed down<br>Pains in your lower back<br>Sore muscles<br>Trouble getting your breath (when you're not exercising)<br>Hot or cold spells (suddenly feeling hot or cold for no reason)<br>Numbness or tingling in parts of your body<br>Weakness (feeling weak) in parts of your body<br>Heavy feelings in your arms or legs<br>Nausea or upset stomach (feeling like you might throw up, or having an upset stomach)<br>Constipation (when it's hard to have a B.M. or go poop)<br>Loose (runny) BM's or diarrhea<br>Pain in your stomach or abdomen (stomach aches)<br>Your heart beating too fast (even when you're not exercising)<br>Difficulty swallowing<br>Losing your voice<br>Blurred vision (when things look blurry, even with glasses on)<br>Vomiting (or throwing up)<br>Feeling bloated or gassy<br>Food making you sick<br>Pain in your knees, elbows or other joints |
| PedsQL                                 | It is hard for me to walk more than one block/or one meter<br>It is hard for me to run<br>It is hard for me to do sports activity or exercise<br>It is hard for me to lift something heavy<br>It is hard for me to take a bath or shower by myself<br>It is hard to me to do chores around the house<br>I hurt or ache<br>I have low energy<br>I feel afraid or scared<br>I feel sad or blue<br>I feel angry<br>I have trouble sleeping<br>I worry about what will happen to me<br>I have trouble getting along with other kids<br>Other kids do not want to be my friend                                                                                                                                                                                                                                                                                                                                                                                                          |

|                                                                                                                                                                                                                                                                                                                               |                                                                                                                                                                                                                                                                                                                                                                                                                                                                                                                                              |
|-------------------------------------------------------------------------------------------------------------------------------------------------------------------------------------------------------------------------------------------------------------------------------------------------------------------------------|----------------------------------------------------------------------------------------------------------------------------------------------------------------------------------------------------------------------------------------------------------------------------------------------------------------------------------------------------------------------------------------------------------------------------------------------------------------------------------------------------------------------------------------------|
|                                                                                                                                                                                                                                                                                                                               | <p>Other kids tease me<br/> I cannot do things that other kids my age can do<br/> It is hard to keep up when I play with other kids<br/> It is hard to pay attention in class<br/> I forget things<br/> I have trouble keeping up with my schoolwork<br/> I miss school because of not feeling well<br/> I miss school to go to the doctor or hospital</p>                                                                                                                                                                                   |
| <p>Long COVID symptoms</p> <p>For how long have you been affected by the symptom?</p> <p>Are you still affected by the symptom? (cases only)</p> <p>Were you affected by this symptom before the COVID-19 infection? (cases only)</p> <p>Do you suspect the symptom to be related to the COVID-19 infection? (cases only)</p> | <p>Abdominal pain<br/> Chest pain<br/> Headaches<br/> Fatigue<br/> Pain and weakness in muscle/joints<br/> Sore throat<br/> Dizziness<br/> Skin rash<br/> Mood swings<br/> Nausea<br/> Fever<br/> Loss of appetite<br/> Breathing problems<br/> Dark circles under the eyes<br/> Heart beating<br/> Memory or concentration difficulties<br/> Cold feet/hands<br/> Cough<br/> Dry and cracked lips<br/> Dizziness when standing<br/> Light sensitivity<br/> COVID fingers/toes (discoloration of fingers and toes)<br/> Extreme paleness</p> |

**Table S12 - Covid-19 Denmark: School/national lockdown and reopening, and changes in testing policies**

| <b>School lockdown and reopening</b>   |                                                                                                                                                                                                                                                                                                                                                                                                                                                          |
|----------------------------------------|----------------------------------------------------------------------------------------------------------------------------------------------------------------------------------------------------------------------------------------------------------------------------------------------------------------------------------------------------------------------------------------------------------------------------------------------------------|
| <b>2020</b>                            |                                                                                                                                                                                                                                                                                                                                                                                                                                                          |
| March 11                               | Lockdown: All schools, day care centers and institutions are closed.                                                                                                                                                                                                                                                                                                                                                                                     |
| April 15                               | Reopening of schools: 0-5th grade, day care centers and institutions.                                                                                                                                                                                                                                                                                                                                                                                    |
| May 18                                 | Reopening of schools: 6th-10th grade and boarding schools.                                                                                                                                                                                                                                                                                                                                                                                               |
| May 27                                 | Reopening of high schools and secondary educations.                                                                                                                                                                                                                                                                                                                                                                                                      |
| December 9                             | Home/online schooling of pupils for 5 <sup>th</sup> to 10 <sup>th</sup> grade, high school students, and students at secondary educations.                                                                                                                                                                                                                                                                                                               |
| December 21                            | Home/online schooling of all pupils.                                                                                                                                                                                                                                                                                                                                                                                                                     |
| <b>2021</b>                            |                                                                                                                                                                                                                                                                                                                                                                                                                                                          |
| February 8                             | Reopening of schools for 0-4 <sup>th</sup> grade                                                                                                                                                                                                                                                                                                                                                                                                         |
| March 1                                | Reopening of all schools and boarding schools on the remote Danish island, Bornholm. All boarding school pupils and pupils in 9 <sup>th</sup> and 10 <sup>th</sup> grade in Northern and Western Jutland can return to school.                                                                                                                                                                                                                           |
| March 15                               | All boarding school pupils can return to school, pupils in 5 <sup>th</sup> -8 <sup>th</sup> grade attend school once a week (outdoors) and online schooling the remaining time. All 9 <sup>th</sup> and 10 <sup>th</sup> grade pupils, high school pupils and graduating students in secondary education, except those who live in areas around Copenhagen, can attend school part-time (50%). On small Danish islands, all pupils can return to school. |
| April 6                                | Pupils in 5 <sup>th</sup> -8 <sup>th</sup> grade return to school part-time (50%). The same applies for non-graduating students in high schools and secondary educations.                                                                                                                                                                                                                                                                                |
| April 21                               | Pupils in 5 <sup>th</sup> -8 <sup>th</sup> have the opportunity for outdoor attendance during the weeks when there is no access to indoor teaching. Graduating students in primary schools and in upper secondary and adult education can attend 80% while students in secondary educations can attend fully. The reopening is geographically differentiated and covers all parts of the Denmark with exception of the metropolitan area.                |
| May 6                                  | Pupils in 5 <sup>th</sup> -8 <sup>th</sup> grade can return to school 100%                                                                                                                                                                                                                                                                                                                                                                               |
| May 21                                 | All students in high schools and secondary educations can return 100%                                                                                                                                                                                                                                                                                                                                                                                    |
| <b>National lockdown and reopening</b> |                                                                                                                                                                                                                                                                                                                                                                                                                                                          |
| <b>2020</b>                            |                                                                                                                                                                                                                                                                                                                                                                                                                                                          |
| March 11                               | Lockdown: All civil servants in non-critical functions are sent home. Assembly ban for more than 100 people.                                                                                                                                                                                                                                                                                                                                             |
| March 14                               | The government of Denmark closes its borders to all but Danish citizens, individuals with Danish work or residency permits, and those the Danish government determines have a critical purpose of travel.                                                                                                                                                                                                                                                |
| March 18                               | Assembly for more than 10 people, closure of liberal professions, indoor sports and sports facilities, fitness centers, malls, cultural life.                                                                                                                                                                                                                                                                                                            |
| April 20                               | Reopening of liberal professions.                                                                                                                                                                                                                                                                                                                                                                                                                        |
| May 7                                  | Reopening of outdoor sports and sports facilities.                                                                                                                                                                                                                                                                                                                                                                                                       |
| May 11                                 | Reopening of all retail.                                                                                                                                                                                                                                                                                                                                                                                                                                 |
| May 18                                 | Reopening of restaurants and churches.                                                                                                                                                                                                                                                                                                                                                                                                                   |
| May 21                                 | Reopening of museums, theaters, cinemas and zoos.                                                                                                                                                                                                                                                                                                                                                                                                        |
| May 27                                 | Reopening of adult education and public research activities.                                                                                                                                                                                                                                                                                                                                                                                             |
| June 8                                 | Assembly ceiling is raised to 50 persons. Reopening of fitness centers and indoor swimming facilities.                                                                                                                                                                                                                                                                                                                                                   |
| July 4                                 | Assembly ceiling is raised to 100 persons.                                                                                                                                                                                                                                                                                                                                                                                                               |
| September 19                           | Assembly ceiling is lowered to 50 people, venues can still have up to 500 seated guests. Cafes, bars, and restaurants must close at 22.00. For all other workplaces - both private and public - the government encourages employees to work from home to the extent possible and appropriate.                                                                                                                                                            |
| December 17                            | All major shopping centers in the country close down.                                                                                                                                                                                                                                                                                                                                                                                                    |
| December 21                            | All leisure activities and liberal professions, such as hairdressers, close down.                                                                                                                                                                                                                                                                                                                                                                        |
| December 25                            | All stores except pharmacies and supermarkets close down.                                                                                                                                                                                                                                                                                                                                                                                                |
| <b>2021</b>                            |                                                                                                                                                                                                                                                                                                                                                                                                                                                          |
| March 1                                | Denmark partially reopens: Department stores under 5000 m2 (with the exception of department stores in malls) are reopening with stricter square meter requirements. Stores of more than 5000 m2 can be open to a very limited number of customers by appointment. Outdoor cultural institutions reopened (requirement for negative COVID-19 test). The assembly ban is raised to 25 people for outdoor sports and association activities.               |
| March 22                               | The parliament has agreed to reopen society - with a few exceptions - when citizens older than 50 years have been vaccinated.                                                                                                                                                                                                                                                                                                                            |
| April 6                                | Liberal professions reopen on display of EU COVID certificate.                                                                                                                                                                                                                                                                                                                                                                                           |
| April 21                               | Shopping malls, department stores, as well as outdoor seating and organized sports for children. Outdoor dining at restaurants and cafes, museums, art galleries and libraries reopen on display of EU COVID certificate.                                                                                                                                                                                                                                |
| May 6                                  | The assembly ceiling is raised to 25 indoors, venues can have up to 2,000 seated guests. Indoor dining at restaurants and cafes, conferences, venues, theatres and cinemas on presentation of EU COVID certificate. Organized indoor sports for adults over the age of 18 on presentation of EU COVID certificate.                                                                                                                                       |
| May 21                                 | All remaining sports, leisure and association activities are open upon presentation of EU COVID certificate. Indoor facilities in amusement parks, zoos, playgrounds, etc. reopened upon presentation of EU COVID certificate.                                                                                                                                                                                                                           |
| June 14                                | The opening hours at restaurants are extended to 24.00. EU COVID certificate requirements are abolished for libraries, etc.                                                                                                                                                                                                                                                                                                                              |

|                                          |                                                                                                                                                                                                                                                                                                                                                                                                                 |
|------------------------------------------|-----------------------------------------------------------------------------------------------------------------------------------------------------------------------------------------------------------------------------------------------------------------------------------------------------------------------------------------------------------------------------------------------------------------|
| July 15                                  | Opening hours for restaurants are extended to 02.00.                                                                                                                                                                                                                                                                                                                                                            |
| August 1                                 | Corona passport requirements are abolished for amusement parks, zoos, fairs, etc.                                                                                                                                                                                                                                                                                                                               |
| September 1                              | Assembly ceiling for larger assemblies is abolished. Nightclubs reopen against EU COVID certificate requirements.                                                                                                                                                                                                                                                                                               |
| September 10                             | Requirements for corona passports are abolished for restaurants, water parks, etc.                                                                                                                                                                                                                                                                                                                              |
| September 10                             | Covid-19 is no longer considered a socially critical disease in Denmark                                                                                                                                                                                                                                                                                                                                         |
| <b>Testing policies - 2020 timeline*</b> |                                                                                                                                                                                                                                                                                                                                                                                                                 |
| March 11                                 | Only citizens who both (a) have symptoms AND (b) accommodate specific criteria (e.g. key workers, admitted to hospital, came into contact with an infected person, returned from overseas).                                                                                                                                                                                                                     |
| April 20                                 | Testing of any citizen showing Covid-19 symptoms.                                                                                                                                                                                                                                                                                                                                                               |
| May 12                                   | Open public testing access (e.g. "drive through" testing also available to citizens without symptoms).                                                                                                                                                                                                                                                                                                          |
| May 29                                   | Open public testing (e.g. "drive through" testing available to citizens without symptoms). Visitors entering Denmark are encouraged to get tested upon arrival at the border.                                                                                                                                                                                                                                   |
| August 14                                | Open public testing (e.g. "drive through" testing is accessible to asymptomatic citizens). The Government will set up additional laboratory facilities in Western Denmark operated by private test centers to reduce the transportation and response times when testing. The target is that 80% must have access to COVID-19 testing within 24 hours and that 80% will receive a test response within 24 hours. |

\*<https://askabout.io/covid-19/ask/what-is-the-government-response-timeline-for-denmark/>
